# Supplementary material for: Comparative proteomics analysis in different stages of urothelial bladder cancer for identification of potential biomarkers: highlighted role for antioxidant activity
Source: Clin Proteomics. 2023 Jul 27;20:28. doi: 10.1186/s12014-023-09419-8 (PMC10373361; doi:10.1186/s12014-023-09419-8)
Supplement: Supplementary file 2 — Supplementary Table S2: The list of GO enriched in 12 identified proteins [file 12014_2023_9419_MOESM2_ESM.xlsx]

## Sheet: Sheet1
Biological Process
GO-term	Description	Count in network	Strength	False discovery rate
GO:0019430	Removal of superoxide radicals	2 of 13	2.4	0.0356
GO:0045730	Respiratory burst	2 of 18	2.26	0.0492
GO:0042744	Hydrogen peroxide catabolic process	3 of 28	2.24	0.0048
GO:0045454	Cell redox homeostasis	3 of 60	1.91	0.0147
GO:1990748	Cellular detoxification	4 of 101	1.81	0.0048
GO:0034614	Cellular response to reactive oxygen species	3 of 133	1.57	0.0492
GO:0034599	Cellular response to oxidative stress	5 of 244	1.43	0.0164
GO:0055114	Oxidation-reduction process	7 of 939	1.02	0.0492
GO:0001775	Cell activation	7 of 1075	0.96	0.0249
GO:0009056	Catabolic process	7 of 2042	0.75	0.0492
GO:0070887	Cellular response to chemical stimulus	8 of 2919	0.65	0.0492
Molecular Function
GO:0051920	Peroxiredoxin activity	3 of 7	2.84	6.82e-05
GO:0008379	Thioredoxin peroxidase activity	2 of 5	2.81	0.0058
GO:0004601	Peroxidase activity	3of 41	2.08	0.0037
GO:0045296	Cadherin binding	4 of 334	1.29	0.0209
GO:0016491	Oxidoreductase activity	6 of 726	1.05	0.0211
Cellular component
GO:0070062	Extracellular exosome	11 of 2099	0.93	4.09e-07
GO:0005829	Cytosol	11 of 5193	0.54	0.001
GO:0005576	Extracellular region	12 of 4166	0.67	0.000374
